1 **Improvements in the Sequencing and Assembly of Plant Genomes**

2

3 Priyanka Sharma<sup>1</sup>, Othman Al-Dossary<sup>1,2</sup>, Bader Alsubaie<sup>1,2</sup>, Ibrahim Al-Mssallem<sup>2</sup>, Onkar

4 Nath<sup>1</sup>, Neena Mitter<sup>1</sup>, Gabriel Rodrigues Alves Margarido<sup>1,4</sup>, Bruce Topp<sup>1</sup>, Valentine

5 Murigneux<sup>3</sup>, Ardy Kharabian Masouleh<sup>1</sup>, Agnelo Furtado<sup>1</sup>, Robert J Henry<sup>1,5</sup>

6

7 <sup>1</sup>Queensland Alliance for Agriculture and Food Innovation, University of Queensland,

8 Brisbane 4072 Australia

9

10 <sup>2</sup>College of Agriculture and Food Sciences, King Faisal University, Al Hofuf, Saudi Arabia

11

12 <sup>3</sup>Genome Innovation Hub, University of Queensland Brisbane 4072 Australia

13

14 <sup>4</sup>Departamento de Genética, Escola Superior de Agricultura “Luiz de Queiroz”, Universidade

15 de São Paulo, Piracicaba, São Paulo 13418-900, Brazil

16

17 <sup>5</sup>Centre of Excellence for Plant Success in Nature and Agriculture, University of Queensland,

18 Brisbane 4072 Australia

19

20

21

22

23 **Abstract**

24

25 **Background** Advances in DNA sequencing have reduced the difficulty of sequencing and  
26 assembling plant genomes. A range of methods for long read sequencing and assembly have  
27 been recently compared and we now extend the earlier study and report a comparison with  
28 more recent methods.

29 **Results** Updated Oxford Nanopore Technology software supported improved assemblies.  
30 The use of more accurate sequences produced by repeated sequencing of the same molecule  
31 (PacBio HiFi) resulted in much less fragmented assembly of sequencing reads. The use of  
32 more data to give increased genome coverage resulted in longer contigs (higher N50) but  
33 reduced the total length of the assemblies and improved genome completeness (BUSCO).  
34 The original model species, *Macadamia jansanii*, a basal eudicot, was also compared with the  
35 3 other *Macadamia* species and with avocado (*Persea americana*), a magnoliid, and jojoba  
36 (*Simmondsia chinensis*) a core eudicot. In these phylogenetically diverse angiosperms,  
37 increasing sequence data volumes also caused a highly linear increase in contig size,  
38 decreased assembly length and further improved already high completeness. Differences in  
39 genome size and sequence complexity apparently influenced the success of assembly from  
40 these different species.

41 **Conclusions** Advances in long read sequencing technology have continued to significantly  
42 improve the results of sequencing and assembly of plant genomes. However, results were  
43 consistently improved by greater genome coverage (using an increased number of reads) with  
44 the amount needed to achieve a particular level of assembly being species dependant.

45

46 Keywords: long read sequencing, assembly, plant, Pacific Biosciences, HiFi reads, Oxford  
47 Nanopore Technology

48

## 49 **Background**

50 Recent advances in DNA sequencing technology have facilitated the sequencing and  
51 assembly of plant genomes with a rapid growth in reports of high quality chromosome level  
52 assemblies [1]. A basal eudicot, *Macadamia jansanii*, was used to compare the range of long  
53 read sequencing and assembly technologies available in 2019[2]. The Pac Bio (Sequel),  
54 Oxford Nanopore Technology (PromethION) and BGI (single-tube Long Fragment Read)  
55 platforms were applied to the analysis of the same sample. Assembly tools were evaluated for  
56 these data sets and the contribution of short reads to improving assemblies assessed [2].  
57 Technology improvements had delivered ongoing increases in the length and quality of  
58 sequence reads delivered by these platforms. Since the original study, significant further  
59 advances have been made with the use of repeated sequencing of the same molecule to  
60 greatly increase sequence accuracy for long reads. This technology allows the generation of  
61 long reads (10-25kb) with greater than 99.5% accuracy [3]. Comparison of long read  
62 technologies demonstrates the pros and cons of different platforms in relation to contiguity,  
63 accuracy of sequence and data analysis time [4]. We now update the earlier study to  
64 demonstrate the impact of these improvements on genome assemblies. Factors such as the  
65 volume of data (bp) used in the assembly were explored for the *Macadamia* genome, related  
66 species and other diverse species with similar sized genomes.

67

## 68 **Long read versus HiFi assemblies**

69 Comparison of assemblies based upon long reads [5] and circular consensus sequence (CCS)  
70 reads from HiFi [3], showed the greater accuracy of the CCS reads resulted in greatly  
71 improved assemblies for the *Macadamia janseni* genome (Table 1).

72

73 Table 1 Improvement in long read sequencing (Pac Bio) for *Macadamia janseni* when using  
74 higher accuracy sequencing.

|                   | Long reads*[2] | HIFI   |
|-------------------|----------------|--------|
| Total data        | 65.2Gb         | 28Gb   |
| Contig N50        | 1.57Mb         | 4.49Mb |
| Assembly length   | 758Mb          | 738Mb  |
| Number of contigs | 762            | 284    |
| BUSCO             | 97%            | 98%    |

75

76 \*phased Falcon assembly

77

78

79 The assembly with the high quality HiFi reads was less fragmented with slightly reduced total  
80 genome length and improved completeness (BUSCO). The use of around 20Gb of high  
81 quality (HiFi) data gave N50 values of 4 Mb and resulted in assemblies with fewer than 300  
82 contigs required to cover the genome. This represents a significant advance over the  
83 assemblies possible when this sample was used previously to compare different long read  
84 platforms and assembly tools, many of which required long computing times to assemble  
85 contigs [2]. The high quality IPA assembly had a run time of 20 h with 120 Gb peak memory  
86 on the FlashLite computer cluster. This analysis requirement compares favourably with the  
87 results for a large number of earlier assembly tools reported for the same sample[2], but

88 provides a much higher quality assembly. Assembly of the HiFi data with other recent tools  
89 was also compared. Flye resulted in a highly fragment genome of 993 Mb with an N50 of  
90 459 kb, while Hifiasm produced a genome of 827 Mb composed of 779 contigs but with an  
91 N50 of 46.1 Mb and a L75 of 14.

## 92 **Results for other *Macadamia* species**

93 *Macadami jansonii* is an endangered species and is one of four species in the *Macadamia*  
94 genus. Sequences of all four species were obtained using the same HiFi techniques and all  
95 gave similar high quality outcomes when assembled (Table 2).

96

97 Table 2 Comparison of assemblies of *Macadamia* species\*

|                   | <i>M. jansonii</i> | <i>M. integrifolia</i> | <i>M. tetraphylla</i> | <i>M. ternifolia</i> |
|-------------------|--------------------|------------------------|-----------------------|----------------------|
| Contig N50        | 4.5Mb              | 5.3Mb                  | 10.0Mb                | 6.4Mb                |
| Longest Contig    | 16.6Mb             | 26.4Mb                 | 32.1Mb                | 21.2Mb               |
| Assembly Length   | 738Mb              | 742Mb                  | 707Mb                 | 716Mb                |
| Number of contigs | 284                | 249                    | 153                   | 211                  |
| BUSCO             | 98%                | 98%                    | 97%                   | 98%                  |

98

99 \*Primary assemblies shown. For details of associate assemblies see supplementary Table 1.

## 100 **Results for other diverse plant species**

101 Methods for sequencing plant genomes need to be applied to genomes with a wide range of  
102 sizes and complexities. *Macadamia* is a basal eudicot. Other diverse flowering plant genomes  
103 were sequenced to determine how widely applicable the results of this study would be in

104 plant genome sequencing. Jojoba (*Simmondsia chinensis*), a core eudicot from the  
105 Caryophyllales, and avocado, a magnoliid, were compared. The three diverse genomes were  
106 all similar in size (700-1000Mb). Many important plant genomes are in or near this size range  
107 [6]. *M. jansanii* is an endangered species with relatively low heterozygosity, avocado has  
108  
109 much greater heterozygosity [7] and jojoba has been reported to be a tetraploid[8].  
110 Heterozygosity and polyploidy both complicate assembly [9,10]. The quality of the  
111 assemblies was more contiguous (fewer contigs required to cover the genome) or similar  
112 (avocado) with less data in each of these cases when HiFi reads were used instead of the  
113 earlier continuous long reads (Table 3). The macadamia and jojoba genomes gave N50  
114 values that were larger when using the HiFi (CCS) reads than with long reads (CLR).  
115 However, the N50 for the slightly larger genome of avocado was greater when using the long  
116 reads compared to that obtained with the HiFi reads. This suggest that the larger genome  
117 may have longer repeat regions that limit contig assembly in some parts of the genome with  
118 HiFi reads.

119

120

121 Table 3 Long read versus HiFi sequencing of other diverse species

122

|                   | Long reads |         | HiFi   |         |
|-------------------|------------|---------|--------|---------|
|                   | Jojoba     | Avocado | Jojoba | Avocado |
| Total data        | 152Gb      | 159Gb   | 41.4Gb | 44Gb    |
| Contig N50        | 4.73Mb     | 6.7Mb   | 4.89Mb | 4.3Mb   |
| Assembly length   | 1260Mb     | 787Mb   | 780Mb  | 749Mb   |
| Number of contigs | 762        | 308     | 284    | 298     |
| BUSCO             | 99%        | 99%     | 98%    | 98%     |

123

124

125

### 126 **Impact of the sequencing coverage on the assemblies**

127 The length of the contigs assembled (Figure1) was directly related to the volume of sequence  
128 data used. Analysis of four related Macadamia species gave a similar linear relationship  
129 between data volume and contig N50 for input of between 10 and 40 times genome coverage.

130 The size of the contigs assembled showed a similar dependence upon the amount of sequence  
131 data (genome coverage) across species with the slope of the relationship varying for different  
132 species (Figure 2). The macadamia genomes could be assembled with lower coverage. This  
133 may be a function of genome size with their smaller genomes requiring less coverage to

134 achieve a given N50. The larger genomes may contain a higher proportion of repetitive  
135 sequences that are difficult to assemble.

136 Assemblies based upon more data were slightly shorter in total length (Figure 3). This  
137 reduction was probably due to removal of duplicated end sequences as contigs were joined.

138 The high quality of these assemblies was confirmed by BUSCO values of more than 95%.

139 Genome completeness was high in all cases but increased slightly when more data was used  
140 in the assembly (Figure 4).

141 These results were confirmed when applying these methods to sequencing the other  
142 phylogenetically diverse plant genomes with slightly larger genomes with greater genome  
143 complexity. In each case N50 and completeness increased with data volume and genome size  
144 declined.

#### 145 **Impact of the read length on the assemblies**

146 The length of sequence reads was also expected to influence the assembly. Examination of  
147 size distribution of the 6 species showed that the length of the sequences varied slightly  
148 within the expected range around 15kb for HiFi data. The minor differences in mean read  
149 length and numbers of longer reads did not explain the differences in the size of the contigs  
150 assembled (Supplementary Figure 1). This suggest that the different amounts of sequence  
151 data required to drive assembly to a particular level may be associated more with the  
152 complexity of the sequence. The close relationship between sequence volume and N50 for the  
153 four *Macadamia* species may reflect the similar sequence complexity of the species in this  
154 group. The jojoba and avocado required more sequence data to reach the same level of  
155 assembly. The slightly larger genome size of these two species may be enough to explain this  
156 difference due to the likely higher proportion of repetitive sequence in the somewhat larger  
157 genomes.



158 **Oxford Nanopore Technologies updates**

159 Oxford Nanopore Technologies (ONT) regularly releases updated basecalling software to  
160 convert the raw electrical signal into sequence data. We repeated the basecalling of the ONT  
161 raw data of *M. jansanii* using different versions of the Guppy basecaller released in March  
162 2019 (v2.3.7), April 2019 (v3.0.3) and June 2020 (v4.0.11). The assembly quality improved  
163 as shown by an increase in the assembly contiguity and in the number of complete BUSCOs  
164 before any polishing (Table 4). The assembly size decreased from 817 Mb to 798 Mb. Two  
165 versions of the Flye assembler were applied to the same basecalled sequence dataset, which  
166 resulted in a significant increase in genome contiguity and completeness as well as a reduced  
167 genome assembly size.

168 Table 4 ONT genome assembly statistics of *M. jansanii* using the Flye assembler, the pass  
169 reads and different Guppy basecallers versions

170

| Basecaller                 | Guppy v2.3.7 |             | Guppy v3.0.3 |           | Guppy v4.0.11 |
|----------------------------|--------------|-------------|--------------|-----------|---------------|
| Assembler                  | Flye v2.5    | Flye v2.4.2 | Flye v2.5    | Flye v2.5 | Flye v2.5     |
| Number of reads            | 1,597,353    |             | 1,592,919    |           | 1,594,802     |
| Contig N50 (Mb)            | 1.44         | 0.94        | 1.51         |           | 1.79          |
| Assembly length (Mb)       | 817          | 845         | 811          |           | 798           |
| Number of contigs          | 2,996        | 4,242       | 2,855        |           | 2,841         |
| Number of contigs (>10 kb) | 2,300        | 3,275       | 2,088        |           | 1,913         |
| BUSCO complete (%)         | 66.8         | 51.4        | 75.1         |           | 79.1          |

171

172

173

174

## 175 **Conclusions**

176 These assemblies represent significant advances over the highly fragmented genomes  
177 previously reported for these species [11-14]. Advances in long read sequencing using  
178 different platforms provide improving options for plant genome sequencing and assembly  
179 [15]. A recent comparison of these methods applied to rice genome sequencing showed  
180 strengths and weaknesses of both with greater sequence accuracy in the Pac Bio assemblies  
181 and more contiguity in the ONT assemblies [4]. The resulting genome sequences can be  
182 evaluated for the best combination of sequence and assembly accuracy [16]. The results  
183 presented here show that contig size can be increased by adding more sequence reads to  
184 achieve a linear increase in N50. This extra data will result in slightly shorter total assembly  
185 lengths and improved completeness of the genomes. The improved methods when combined  
186 with higher level assembly tools[17] will support routine, rapid and efficient generation of  
187 highly accurate chromosome level genome sequences of plant species[18].

## 188 **Methods**

### 189 **DNA extraction**

190 All local, national and international guidelines and legislation was observed in obtaining  
191 samples for this study. *Macadamia jansanii* DNA was prepared as described earlier[19]. Three  
192 other Macadamia species (*M. tetraphylla*, *M. ternifolia* and *M. integrifolia*) and Jojoba  
193 (*Simmondsia chinensis*) were also extracted using this method with minor modifications  
194 where phenol was excluded from the extraction method[20]. Avocado (*Persea americana*)  
195 DNA was isolated by a modified CTAB (cetyl-trimethyl ammonium bromide) DNA  
196 extraction protocol [21,22]. Leaf tissue (0.2 g) was ground and added to 15 ml of 2% CTAB  
197 buffer, pH 8.0 followed by 15 min incubation at 65 °C. The supernatant after centrifugation  
198 at 10 g for 15 min was treated with RNase A (10ng/μl) and incubated at 37°C for 30 min.

199 Chloroform: Isoamyl alcohol (24:1) washes were performed followed by precipitation with  
200 isopropanol and 70% ethanol washes. The DNA was resuspended in ultrapure DNase and  
201 RNase free water for sequencing.

202

### 203 **DNA sequencing and assembly**

204 Long read sequencing was as previously described[19]. Long reads (CLR) were assembled  
205 using Falcon [2] for *M. jansinii* and Canu v 2.0 for the other genomes. HiFi gDNA libraries  
206 were prepared using sheared genomic DNA (~15-20 kb) was sequenced on a PacBio Sequel  
207 II (software/chemistry v9.0.0) following diffusion loading. Sequence data was processed to  
208 generate CCS reads using the default settings of the CCS application (v4.2.0) in SMRT Link  
209 (v9.0.0); minimum parameters for passes (3), accuracy (0.99), CCS read length (10) and  
210 maximum CCS read length (50000). CCS reads were assembled using the Improved Phased  
211 Assembly (IPA) method (PacBio). The IPA assembly tool  
212 (<https://github.com/PacificBiosciences/pbbioconda/wiki/Improved-Phased-Assembler>) uses  
213 the HiFi sequencing reads (high-quality consensus reads) and generates phased assembly.  
214 This produces a primary contig folder, including the main assembly and an associated contig,  
215 containing haplotigs and duplications. For all assemblies, 24 CPUs and 120Gb of memory  
216 was employed.

217

### 218 **Assessment of completeness**

219 The completeness of genome assemblies was evaluated using benchmarking universal single-  
220 copy orthologues (BUSCO) analysis (v4.1.2), using genome mode and lineage  
221 Eukaryota\_odb10 dataset.

222

## 223 **Availability of data**

224 Sequence data from Pac Bio (Sequel), Oxford Nanopore Technology (PromethION) and BGI  
225 (single-tube Long Fragment Read) analysis of *M. jansanii* was described by Murigneux et al  
226 [2]. BGI, PacBio, ONT, and Illumina sequencing data generated in that study were deposited  
227 in the SRA under BioProject PRJNA609013 and BioSample SAMN14217788. Accession  
228 numbers are as follows: BGI (SRR11191908), PacBio (SRR11191909), ONT PromethION  
229 (SRR11191910), ONT MinION (SRR11191911), and Illumina (SRR11191912). Assemblies  
230 and other supporting data are available from the *GigaScience* GigaDB repository [25]. Pac  
231 Bio HiFi reads described in this paper are deposited as CCS reads under NCBI BioProject ID  
232 Macadamia : PRJNA694456; Avocado: PRJNA694184 and Jojoba: PRJNA694450

233

234

## 235 **Additional files**

236 Figure S1: Size distribution of reads sequenced

237

## 238 **Competing interests**

239 The authors declare that they have no competing interests.

## 240 **Funding**

241 The macadamia and avocado components of this project were funded by the Hort Frontiers  
242 Advanced Production Systems Fund as part of the Hort Frontiers strategic partnership  
243 initiative developed by Hort Innovation, with co-investment from University of Queensland  
244 and contributions from the Australian Government. The research on jojoba was funded by  
245 King Faisal University.

246 **Author's contributions**

247 Contributions of authors were as follows. RH, AF, VM, AM, IA Conceptualization; PS, OA,  
248 BA, ON, VM, AF Data curation; PS, OA, BA,ON, GM, VM ,AM, AF Formal Analysis; RH,  
249 AF, IA, AM Funding acquisition; PS, OA, BA, ON ,NM, VM, AM, AF,RH Investigation;  
250 IA, BT, Resources; IA, BT, NM, RH, AM, AF Supervision; RH, PS, ON, AM Writing –  
251 original draft; All authors Writing – review & editing

252

253 **Acknowledgements**

254 The project was supported by the University of Queensland Research Computing Centre (RCC)  
255 and the University of Queensland Genome Innovation Hub.

256

257 **Figure legends**

258

259 Figure1 Influence of data volume on assembly for *Macadamia* species

260 N50 of contigs is plotted against the genome coverage. Genome sizes used to calculate  
261 coverage were; *M.integrifolia*, 895Mb [12]; *M janseni*, 780Mb [2]; *M. tetraphylla*, 758Mb  
262 [23] and *M. ternifolia*, 758Mb (not known but assumed the same as *M. tetraphylla* due to  
263 similar assembly size).

264

265 Figure 2 Influence of data volume on assembly for diverse species. N50 of contigs is plotted  
266 against the genome coverage. Genome sizes used to calculate coverage were, jojoba,  
267 1003Mb[14]; avocado, 920Mb [24] and as in figure 1 for *Macadamia* species

268

269

270 Figure 3 Decrease in length of total assembly as more genome coverage is used in the assembly

271

272 Figure 4 Improvement in genome completeness (BUSCO%) with genome coverage

273

274

275

## References

276

- 277 1. Michael, T.P.; VanBuren, R. Building near-complete plant genomes. *Current Opinion in Plant*  
278 *Biology* **2020**, *54*, 26-33, doi:10.1016/j.pbi.2019.12.009.
- 279 2. Murigneux, V.; Rai, S.K.; Furtado, A.; Bruxner, T.J.C.; Tian, W.; Harliwong, I.; Wei, H.; Yang, B.;  
280 Ye, Q.; Anderson, E., et al. Comparison of long-read methods for sequencing and assembly of  
281 a plant genome. *Gigascience* **2020**, *9*, doi:10.1093/gigascience/giaa146.
- 282 3. Hon, T.; Mars, K.; Young, G.; Tsai, Y.C.; Karalius, J.W.; Landolin, J.M.; Maurer, N.; Kudrna, D.;  
283 Hardigan, M.A.; Steiner, C.C., et al. Highly accurate long-read HiFi sequencing data for five  
284 complex genomes. *Sci Data* **2020**, *7*, doi:ARTN 399 10.1038/s41597-020-00743-4.
- 285 4. Lang, D.; Zhang, S.; Ren, P.; Liang, F.; Sun, Z.; Meng, G.; Tan, Y.; Li, X.; Lai, Q.; Han, L., et al.  
286 Comparison of the two up-to-date sequencing technologies for genome assembly: HiFi reads  
287 of Pacific Biosciences Sequel II system and ultralong reads of Oxford Nanopore. *Gigascience*  
288 **2020**, *9*, doi:10.1093/gigascience/giaa123.
- 289 5. Amarasinghe, S.L.; Su, S.; Dong, X.Y.; Zappia, L.; Ritchie, M.E.; Gouil, Q. Opportunities and  
290 challenges in long-read sequencing data analysis. *Genome Biology* **2020**, *21*, doi:ARTN 30  
291 10.1186/s13059-020-1935-5.
- 292 6. Wendel, J.F.; Jackson, S.A.; Meyers, B.C.; Wing, R.A. Evolution of plant genome architecture.  
293 *Genome Biology* **2016**, *17*, doi:ARTN 37 10.1186/s13059-016-0908-1.
- 294 7. Juma, I.; Geleta, M.; Nyomora, A.; Saripella, G.V.; Hovmalm, H.P.; Carlsson, A.S.; Fatih, M.;  
295 Ortiz, R. Genetic diversity of avocado from the southern highlands of Tanzania as revealed by  
296 microsatellite markers. *Hereditas* **2020**, *157*, 40, doi:10.1186/s41065-020-00150-0.
- 297 8. Tobe, H.; Yasuda, S.; Oginuma, K. Seed Coat Anatomy, Karyomorphology, and Relationships  
298 of *Simmondsia* (*Simmondsiaceae*). *Bot Mag Tokyo* **1992**, *105*, 529-538, doi:Doi  
299 10.1007/Bf02489427.
- 300 9. Kyriakidou, M.; Anglin, N.L.; Ellis, D.; Tai, H.H.; Stromvik, M.V. Genome assembly of six  
301 polyploid potato genomes. *Sci Data* **2020**, *7*, doi:ARTN 88 10.1038/s41597-020-0428-4.
- 302 10. Kyriakidou, M.; Tai, H.H.; Anglin, N.L.; Ellis, D.; Stromvik, M.V. Current Strategies of Polyploid  
303 Plant Genome Sequence Assembly. *Front Plant Sci* **2018**, *9*, doi:ARTN 1660  
304 10.3389/fpls.2018.01660.
- 305 11. Nock, C.J.; Baten, A.; Barkla, B.J.; Furtado, A.; Henry, R.J.; King, G.J. Genome and  
306 transcriptome sequencing characterises the gene space of *Macadamia integrifolia*  
307 (*Proteaceae*). *Bmc Genomics* **2016**, *17*, doi:ARTN 937 10.1186/s12864-016-3272-3.
- 308 12. Nock, C.J.; Baten, A.; Mauleon, R.; Langdon, K.S.; Topp, B.; Hardner, C.; Furtado, A.; Henry,  
309 R.J.; King, G.J. Chromosome-Scale Assembly and Annotation of the *Macadamia* Genome  
310 (*Macadamia integrifolia*HAES 741). *G3-Genes Genomes Genetics* **2020**, *10*, 3497-3504,  
311 doi:10.1534/g3.120.401326.
- 312 13. Rendon-Anaya, M.; Ibarra-Laclette, E.; Mendez-Bravo, A.; Lan, T.Y.; Zheng, C.F.; Carretero-  
313 Paulet, L.; Perez-Torres, C.A.; Chacon-Lopez, A.; Hernandez-Guzman, G.; Chang, T.H., et al.  
314 The avocado genome informs deep angiosperm phylogeny, highlights introgressive  
315 hybridization, and reveals pathogen-influenced gene space adaptation. *Proceedings of the*  
316 *National Academy of Sciences of the United States of America* **2019**, *116*, 17081-17089,  
317 doi:10.1073/pnas.1822129116.
- 318 14. Sturtevant, D.; Lu, S.P.; Zhou, Z.W.; Shen, Y.; Wang, S.; Song, J.M.; Zhong, J.S.; Burks, D.J.;  
319 Yang, Z.Q.; Yang, Q.Y., et al. The genome of jojoba (*Simmondsia chinensis*): A taxonomically

- 320 isolated species that directs wax ester accumulation in its seeds. *Sci Adv* **2020**, *6*, doi:ARTN  
321 eaay3240 10.1126/sciadv.aay3240.
- 322 15. Belser, C.; Istace, B.; Denis, E.; Dubarry, M.; Baurens, F.C.; Falentin, C.; Genete, M.; Berrabah,  
323 W.; Chevre, A.M.; Delourme, R., et al. Chromosome-scale assemblies of plant genomes using  
324 nanopore long reads and optical maps. *Nat Plants* **2018**, *4*, 879+, doi:10.1038/s41477-018-  
325 0289-4.
- 326 16. Wang, W.W.; Das, A.; Kainer, D.; Schalamun, M.; Morales-Suarez, A.; Schwessinger, B.;  
327 Lanfear, R. The draft nuclear genome assembly of *Eucalyptus pauciflora*: a pipeline for  
328 comparing de novo assemblies. *Gigascience* **2020**, *9*, doi:ARTN giz160  
329 10.1093/gigascience/giz160.
- 330 17. Monat, C.; Padmarasu, S.; Lux, T.; Wicker, T.; Gundlach, H.; Himmelbach, A.; Ens, J.; Li, C.D.;  
331 Muehlbauer, G.J.; Schulman, A.H., et al. TRITEX: chromosome-scale sequence assembly of  
332 Triticeae genomes with open-source tools. *Genome Biology* **2019**, *20*, doi:ARTN 284  
333 10.1186/s13059-019-1899-5.
- 334 18. Li, F.W.; Harkess, A. A guide to sequence your favorite plant genomes. *Appl Plant Sci* **2018**, *6*,  
335 doi:ARTN e1030 10.1002/aps3.1030.
- 336 19. Cheng, B.; Furtado, A.; Henry, R.J. Long-read sequencing of the coffee bean transcriptome  
337 reveals the diversity of full-length transcripts. *Gigascience* **2017**, *6*,  
338 doi:10.1093/gigascience/gix086.
- 339 20. Furtado, A. DNA Extraction from Vegetative Tissue for Next-Generation Sequencing. *Cereal*  
340 *Genomics: Methods and Protocols* **2014**, *1099*, 1-5, doi:10.1007/978-1-62703-715-0\_1.
- 341 21. Zou, Y.; Mason, M.G.; Wang, Y.; Wee, E.; Turni, C.; Blackall, P.J.; Trau, M.; Botella, J.R. Nucleic  
342 acid purification from plants, animals and microbes in under 30 seconds. *PLoS Biol* **2017**, *15*,  
343 e2003916, doi:10.1371/journal.pbio.2003916.
- 344 22. Bienvenue, J.M.; Duncalf, N.; Marchiarullo, D.; Ferrance, J.P.; Landers, J.P. Microchip-based  
345 cell lysis and DNA extraction from sperm cells for application to forensic analysis. *J Forensic*  
346 *Sci* **2006**, *51*, 266-273, doi:10.1111/j.1556-4029.2006.00054.x.
- 347 23. Niu, Y.-F.; Li, G.-H.; Ni, S.-B.; He, X.-Y.; Zheng, C.; Liu, Z.Y.; Gong, L.D.; Kong, G.H.; Liu, J.  
348 Genome assembly and annotation of *Macadamia tetraphylla*. *bioRxiv* **2020**  
349 doi: <https://doi.org/10.1101/2020.03.11.987057>
- 350 24. Talavera, A.; Soorni, A.; Bombarely, A.; Matas, A.J.; Hormaza, J.I. Genome-Wide SNP  
351 discovery and genomic characterization in avocado (*Persea americana* Mill.). *Scientific*  
352 *Reports* **2019**, *9*, doi:ARTN 20137 10.1038/s41598-019-56526-4.
- 353 25. Murigneux V, Rai SK, Furtado A, et al. Supporting data for “Comparison of long-read  
354 methods for sequencing and assembly of a plant genome.” GigaScience Database 2020.  
355 <http://dx.doi.org/10.5524/100812>.

356  
357

358 Figure1 Influence of data volume on assembly for Macadamia species N50 of contigs is plotted  
359 against the genome coverage. Genome sizes used to calculate coverage were; *M.integrifolia*,  
360 895Mb [12]; *M.janseni*, 780Mb [2]; *M.tetraphylla*, 758Mb [23] and *M.ternifolia*, 758Mb  
361 (not known but assumed the same as *M.tetraphylla* due to similar assembly size).

362

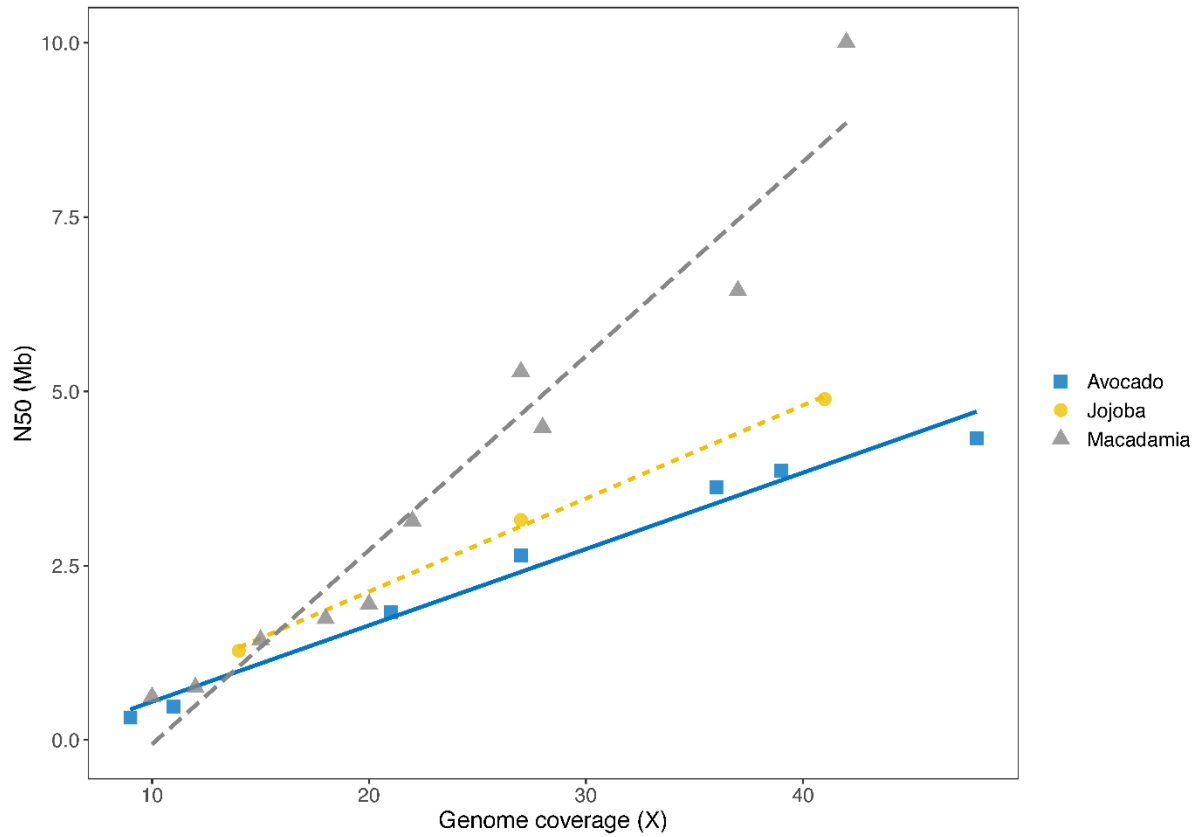

363



364 Figure 2 Influence of data volume on assembly for diverse species. N50 of contigs is plotted  
365 against the genome coverage. Genome sizes used to calculate coverage were, jojoba,  
366 1003Mb[14]; avocado, 920Mb [24] and as in figure 1 for *Macadamia* species

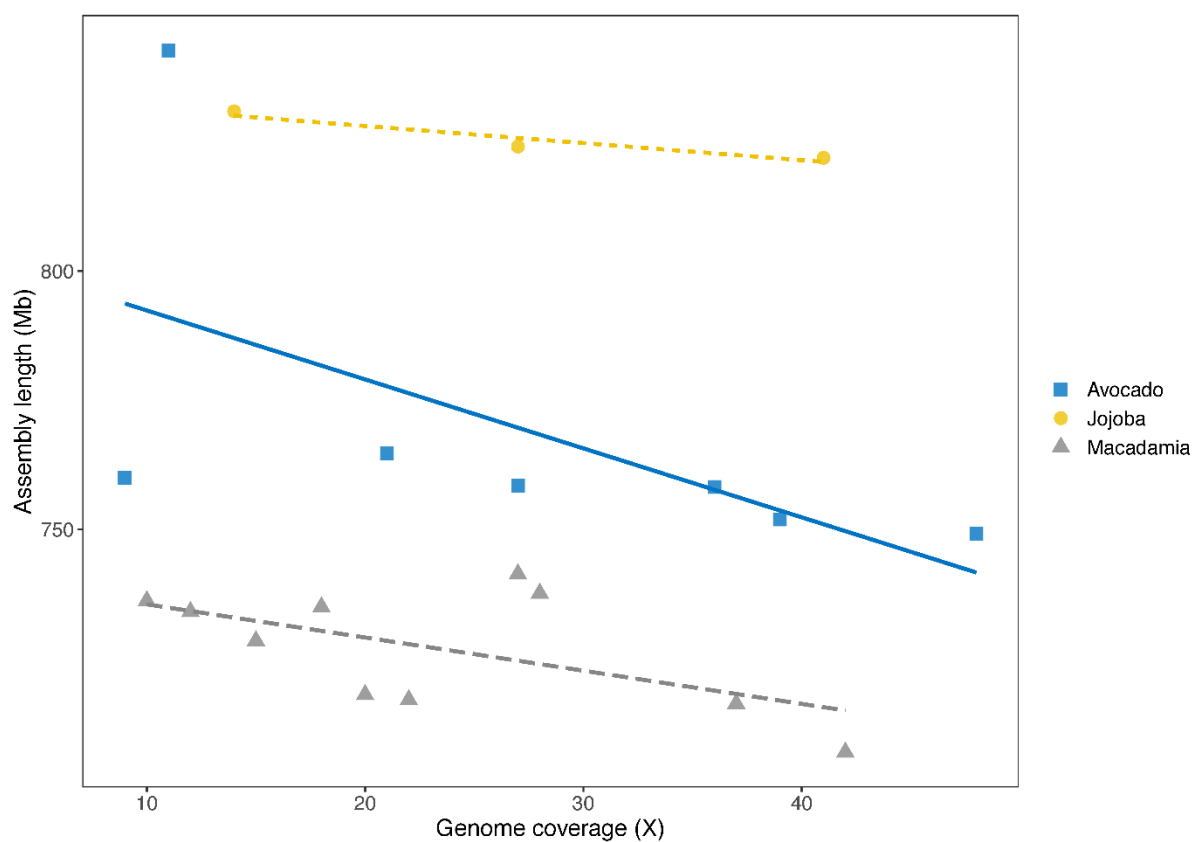

367

368 Figure 3 Decrease in length of total assembly as more genome coverage is used in the assembly

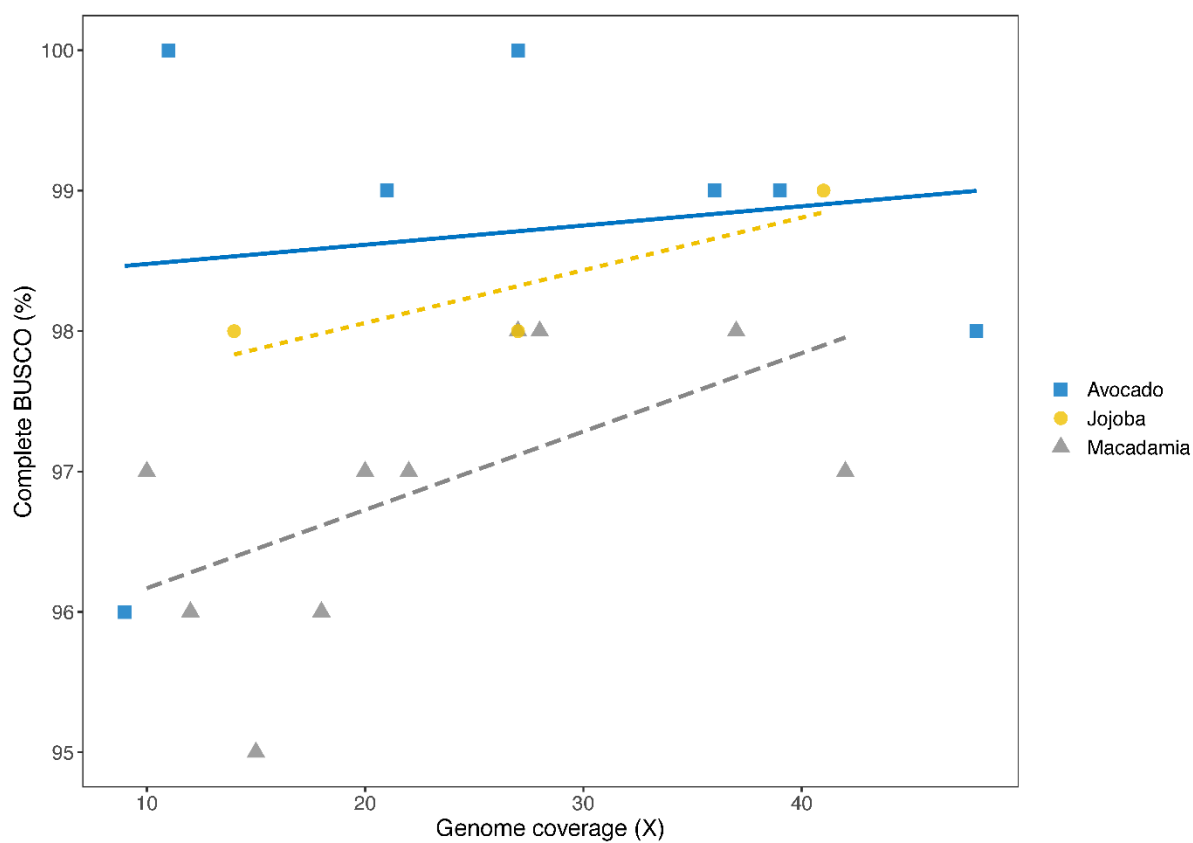

369  
370  
371  
372  
373  
374  
375  
376  
377  
378  
379  
380  
381  
382  
383  
384

385

386 Figure 4 Improvement in genome completeness (BUSCO%) with genome coverage

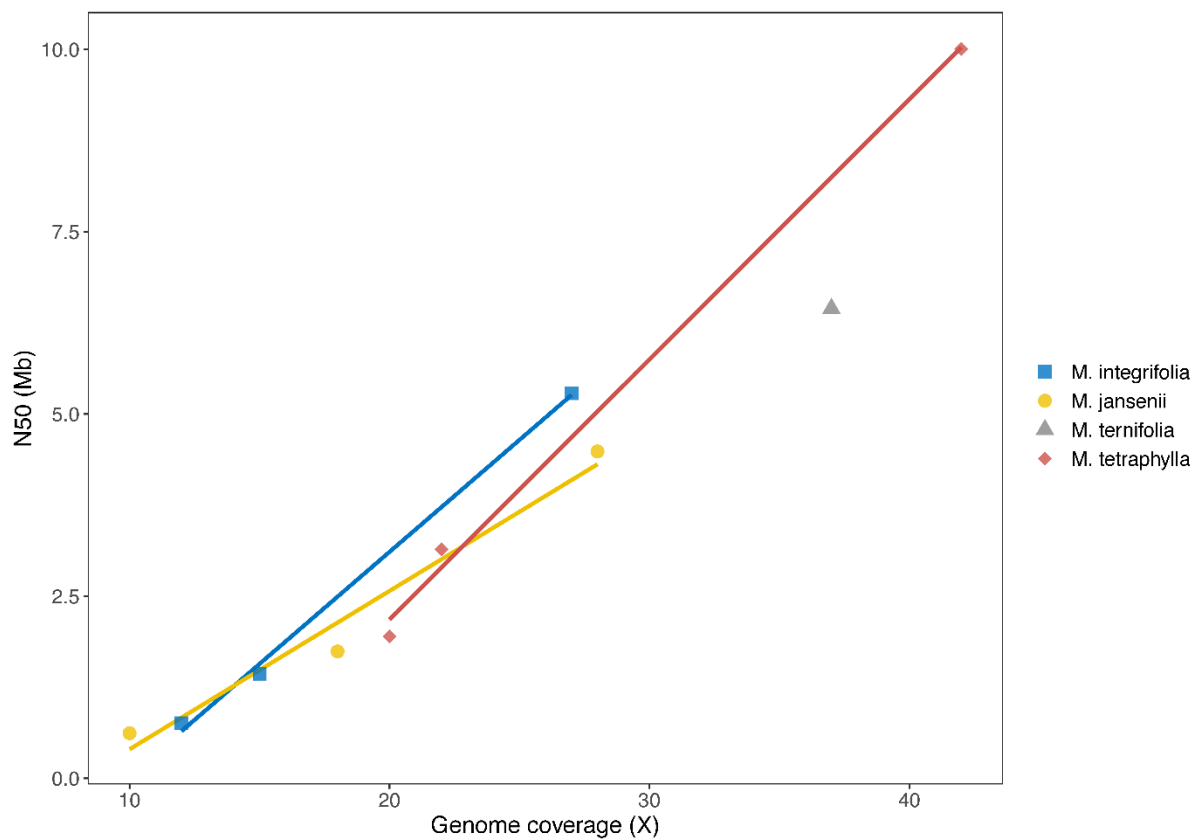

387

388 Figure S1: Size distribution of reads sequenced

389

390

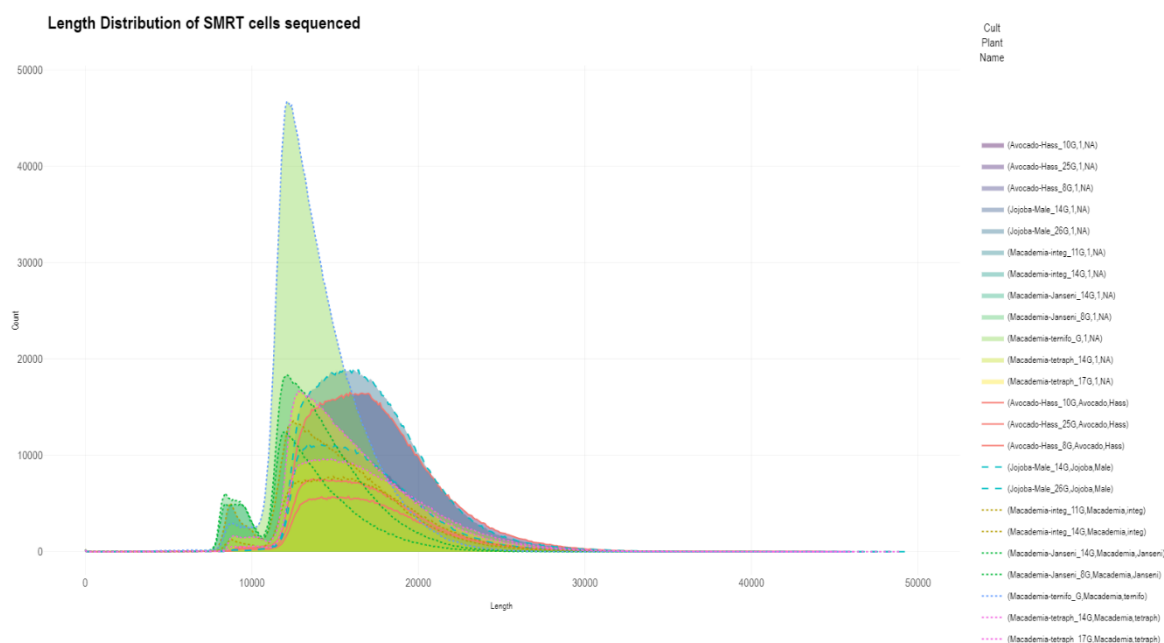

391

392

393

394 Supplementary Table 1 Data for associated contigs in IPA assemblies

395

396

|                   | <i>M. janseni</i> | <i>M. integrifolia</i> | <i>M. ternifolia</i> | <i>M. tetraphyll</i> | Jojoba | Avocado |
|-------------------|-------------------|------------------------|----------------------|----------------------|--------|---------|
|                   |                   | <i>a</i>               |                      | <i>a</i>             |        |         |
| Contig N50        | 0.45Mb            | 1.23Mb                 | 0.77Mb               | 1.83Mb               | 1.69Mb | 1.53Mb  |
| Longest Contig    | 5.23Mb            | 10.22Mb                | 5.68Mb               | 14.97Mb              | 8.25Mb | 10.0Mb  |
| Assembly Length   | 527Mb             | 671Mb                  | 590Mb                | 655Mb                | 738Mb  | 788Mb   |
| Number of Contigs | 3966              | 3226                   | 3006                 | 2103                 | 1999   | 3196    |

397

398

399
